# Supplementary material for: Regions of the amino terminus of the P2X1 receptor required for modification by phorbol ester and mGluR1α receptors
Source: PubMed Central journal article supplement (PMC2704932; doi:10.1111/j.1471-4159.2008.05761.x), 2009-01

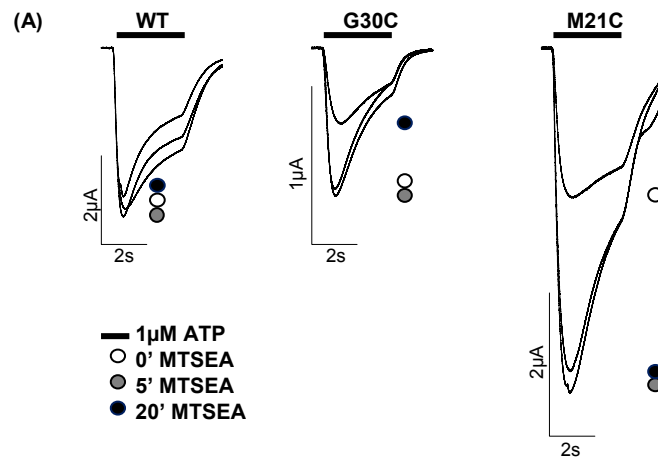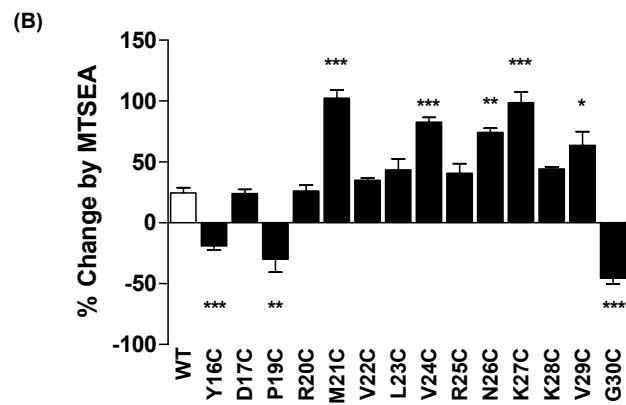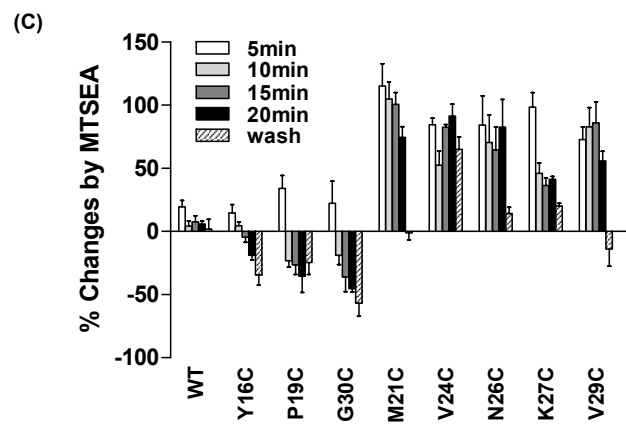

Supplement: jnc0108-0331-SD1.pdf [file jnc0108-0331-SD1.pdf]
